# Supplementary material
Source: Springer Nature journal article supplement (https://www.springermedizin.de/resource/supplementary/12930_2013_54_MOESM2_ESM.pdf/9424650)

Rank 1 Rank 2 Rank 3

No.  
of  
participants  
who  
selected  
the  
respective  
area of  
research

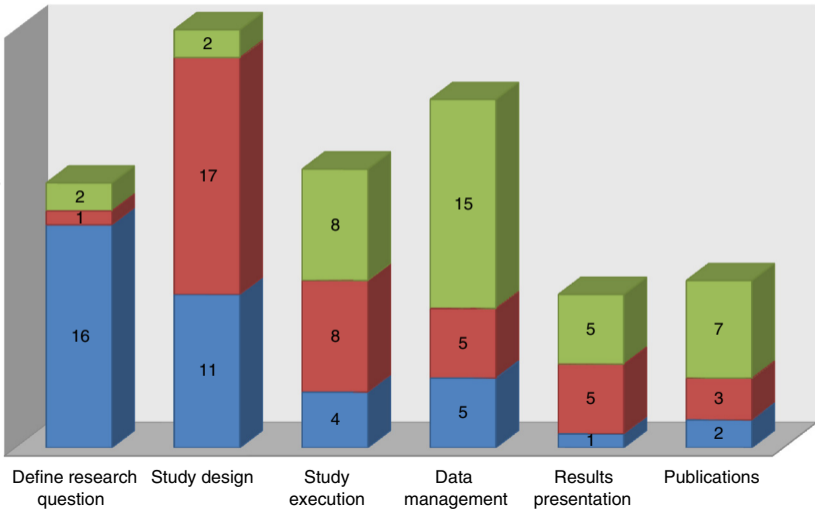

Supplement: MOESM2 [file 9424650]
